# Supplementary material
Source: PubMed Central journal article supplement (PMC4198052)
Supplement: embj0033-1565-sd1.pdf [file embj0033-1565-sd1.pdf]

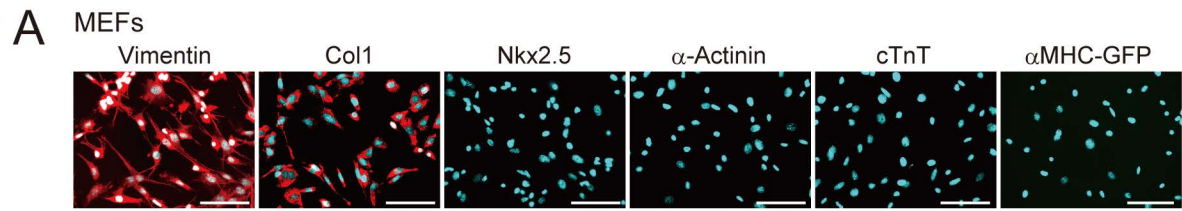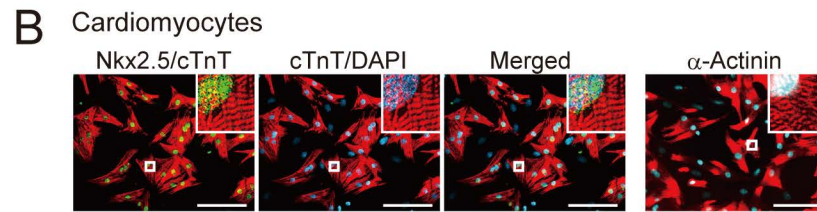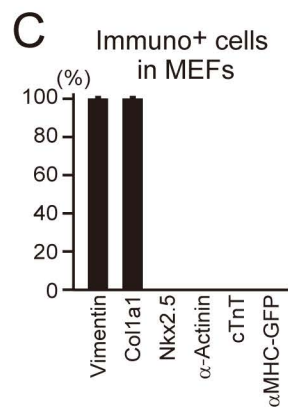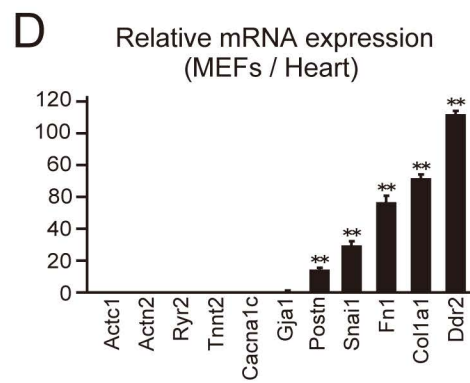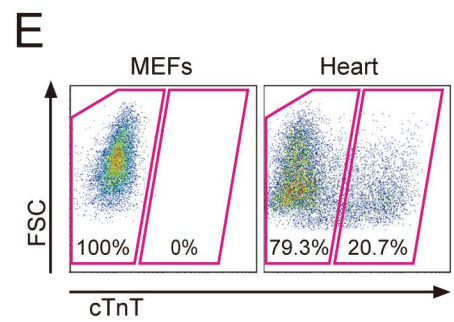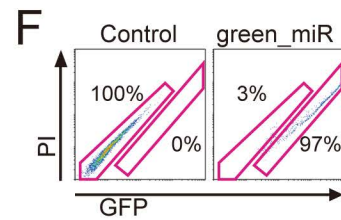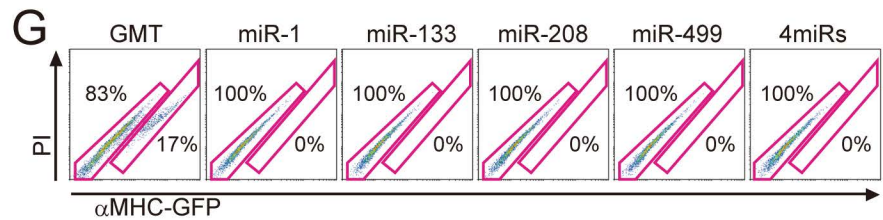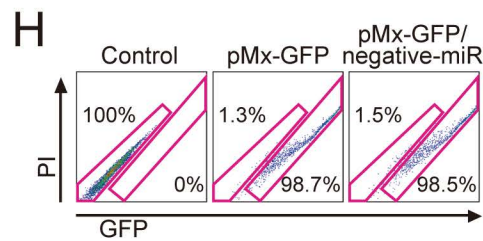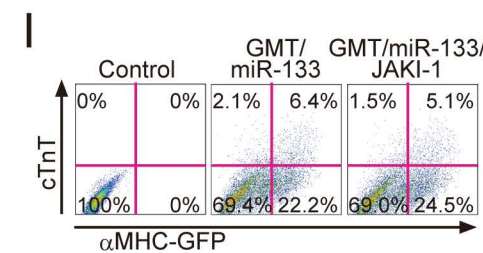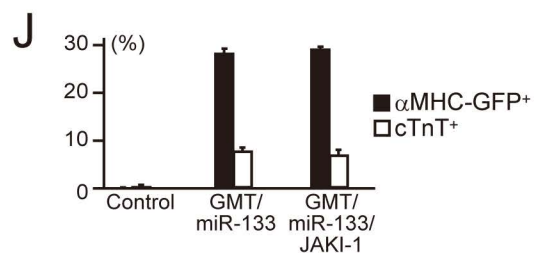

**Figure S1. MEF Cultures Are not Contaminated by Cardiomyocytes or Cardiac Progenitor Cells**

(A) Immunocytochemistry for vimentin, collagen1 (Col1), Nkx2.5,  $\alpha$ -actinin, cTnT, and  $\alpha$ -MHC-GFP, with DAPI staining in MEFs.

(B) Immunostaining for Nkx2.5, cTnT,  $\alpha$ -actinin, and DAPI in murine neonatal cardiomyocytes provided a positive control for immunocytochemistry. High-magnification views in insets show sarcomeric organization.

(C) The percentage of vimentin<sup>+</sup>, Col1<sup>+</sup>, Nkx2.5<sup>+</sup>,  $\alpha$ -actinin<sup>+</sup>, cTnT<sup>+</sup>, and  $\alpha$ -MHC-GFP<sup>+</sup> cells in MEFs ( $n = 3$ ).

(D) Relative mRNA expression of *Actc1*, *Actn2*, *Ryr2*, *Tnnt2*, *Cacna1c*, *Gja1*, *Postn*, *Snai1*, *Fnl1*, *Colla1*, and *Ddr2* in MEFs compared to hearts ( $n = 3$ ).

(E) FACS analyses for cTnT expression in MEFs and mouse hearts. MEFs did not include cTnT<sup>+</sup> cardiomyocytes.

(F) FACS analyses for transfection efficiency of miRNA mimics (green-miR).

(G) FACS analyses for  $\alpha$ MHC-GFP<sup>+</sup> cells. Cells were analyzed 1 week after GMT transduction or miRNA transfection.

(H) FACS analyses for transduction efficiency of pMXs-GFP with and without miRNA mimics in MEFs. Addition of miRNA did not augment the transduction efficiency of pMXs-GFP.

(I, J) FACS analyses for  $\alpha$ MHC-GFP<sup>+</sup> and cTnT<sup>+</sup> cells 1 week after GMT/miR-133 transduction with and without the JAK inhibitor 1 (JAK-I). Quantitative data are shown in (J) ( $n = 3$ ).

All data are presented as means  $\pm$  SEM. \*\*,  $P < 0.01$  vs. relevant control. Scale bars, 100  $\mu$ m.
