# Supplementary material
Source: PubMed Central journal article supplement (PMC4198052)
Supplement: embj0033-1565-sd3.pdf [file embj0033-1565-sd3.pdf]

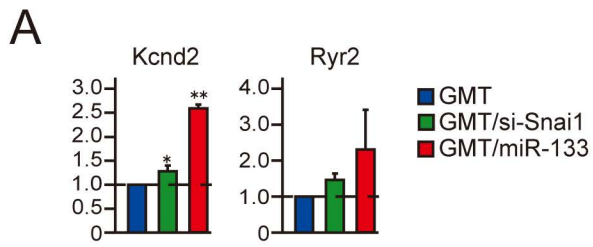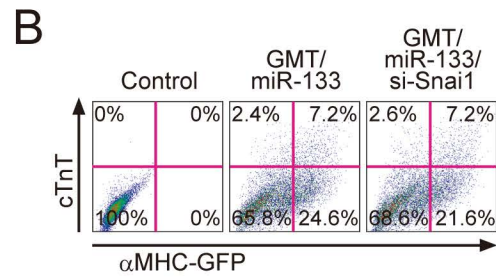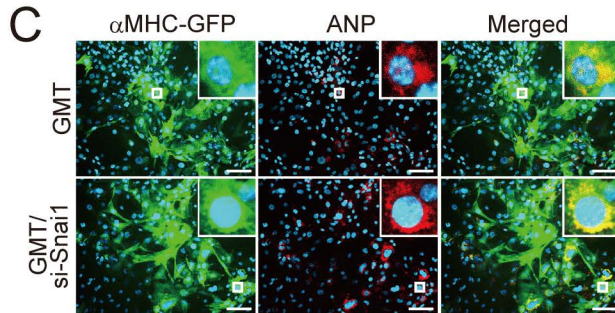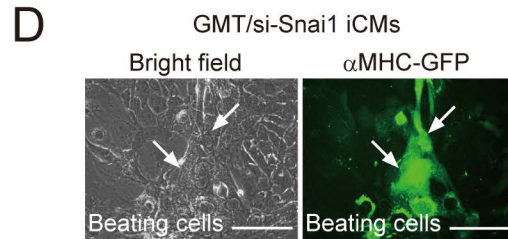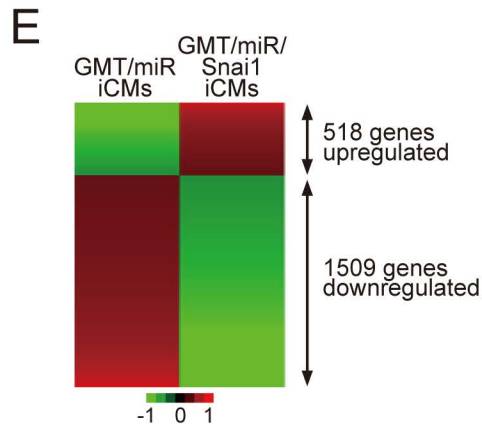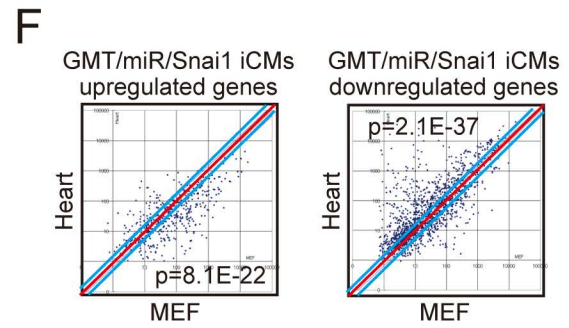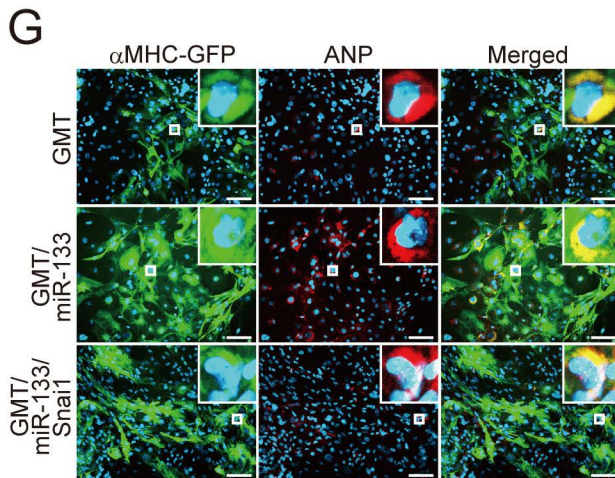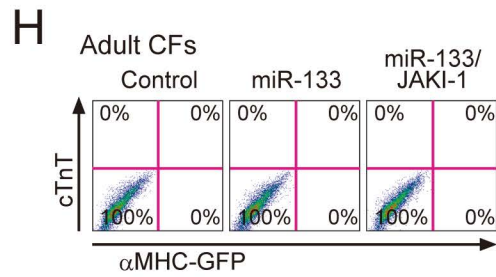

**Figure S3. MiR-133 Alone Does not Induce Cardiac Reprogramming in Adult CFs**

(A) Relative mRNA expression of cardiac genes (*Kcnd2*, *Ryr2*) in MEFs transduced with GMT, GMT/si-Snai1, or GMT/miR-133 ( $n = 3$ ). See also **Figure 4H**.

(B) Snai1 knockdown did not increase cardiac induction in GMT/miR-133-transduced MEFs.

(C) Immunocytochemistry for  $\alpha$ MHC-GFP, ANP, and DAPI.

(D) Spontaneously beating GMT/si-Snai1-iCMs 4 weeks after induction. The beating iCMs (arrows) correspond to Supplementary **Movie S4**.

(E) Heat-map image of microarray data of GMT/miR-133- and GMT/miR-133/Snai1-iCMs ( $n = 1$ ). Differentially expressed genes are shown. See also **Figure 5B**.

(F) The upregulated and downregulated genes in GMT/miR-133/Snai1-iCMs compared with GMT/miR-133-iCMs were analyzed by scatter plots. Snai1 upregulated fibroblast genes and downregulated cardiac-enriched genes.

(G) Immunocytochemistry for  $\alpha$ MHC-GFP, ANP, and DAPI in GMT-, GMT/miR-133- and GMT/miR-133/Snai1-transduced MEFs.

(H) FACS analyses for  $\alpha$ MHC-GFP<sup>+</sup> cells and cTnT<sup>+</sup> cells. Cells were analyzed 1 week after miR-133 transfection with or without JAKI-1 treatment in adult CFs. miRNAs alone did not induce  $\alpha$ MHC-GFP<sup>+</sup> or cTnT<sup>+</sup> cells.

All data are presented as means  $\pm$  SEM. \*\*,  $P < 0.01$ ; \*,  $P < 0.05$  vs. relevant control. Scale bars, 100  $\mu$ m.
