# Supplementary material
Source: PubMed Central journal article supplement (PMC4198052)
Supplement: embj0033-1565-sd4.pdf [file embj0033-1565-sd4.pdf]

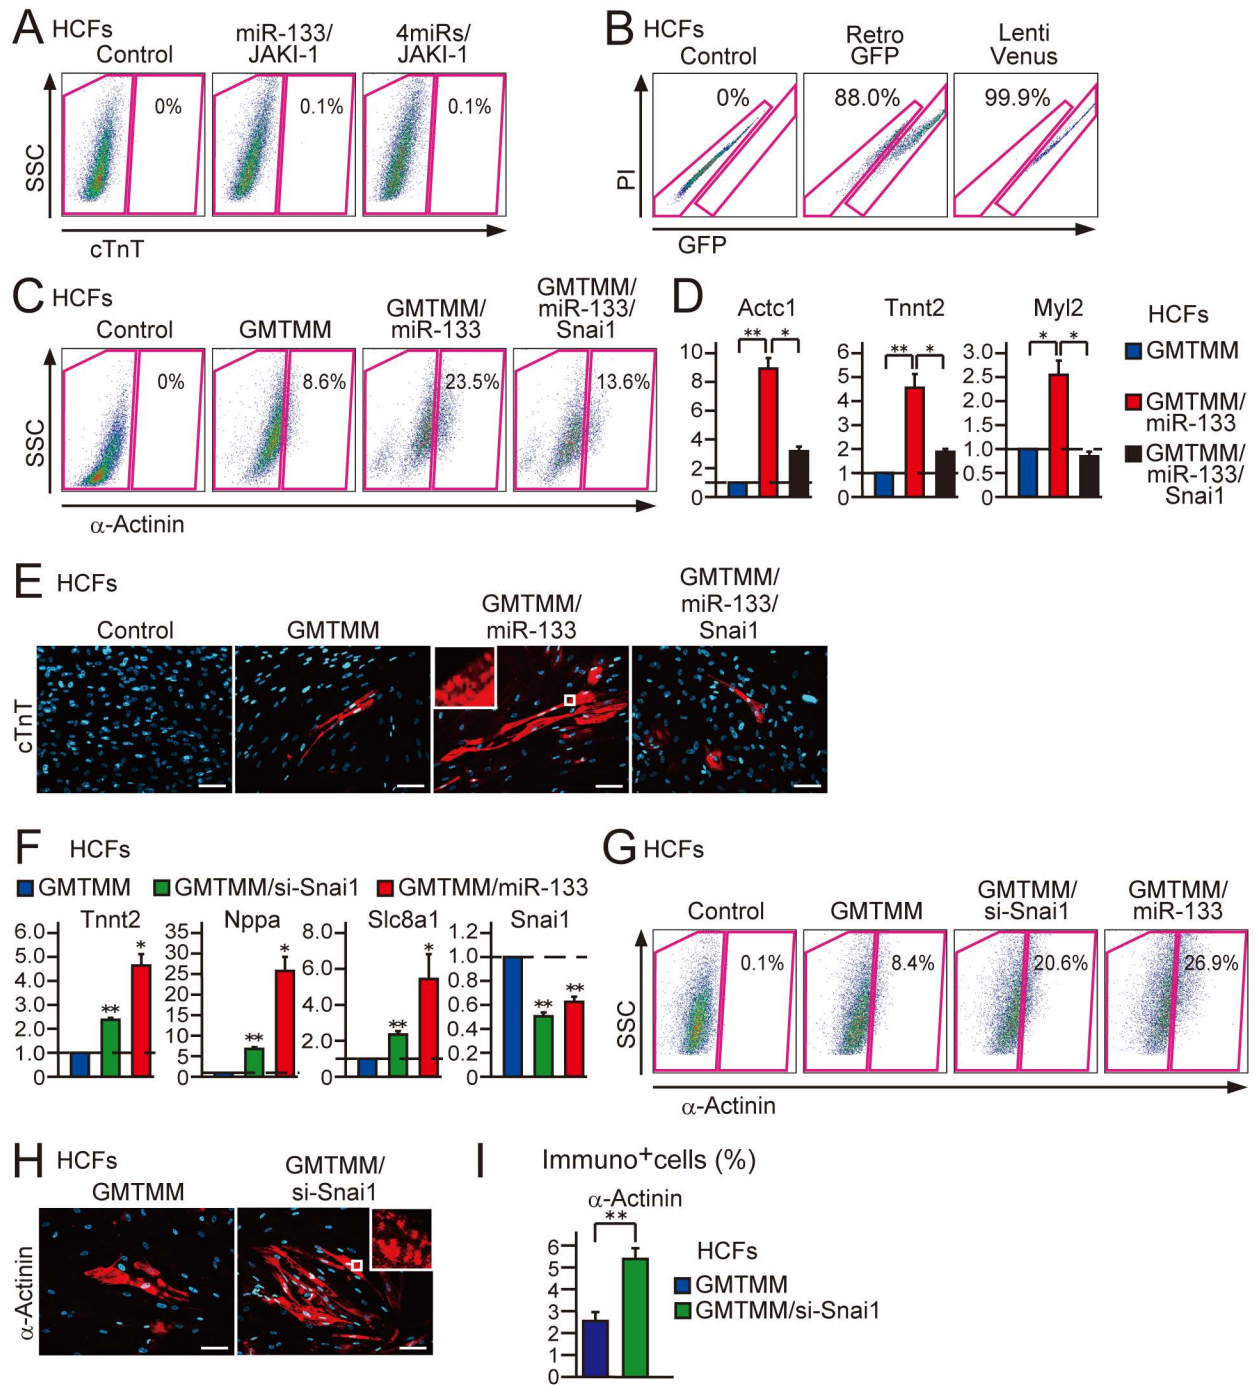

**Figure S4. Snai1 Suppression Increases Cardiac Gene Expression in Human Cardiac Reprogramming**

(A) FACS analyses for cTnT<sup>+</sup> cells. Cells were analyzed 1 week after miR-133 or 4miRs transfection with JAKI-1 treatment in HCFs.

(B) Transduction efficiency of pantropic retrovirus and lentivirus in HCFs.

(C) FACS analyses for  $\alpha$ -actinin<sup>+</sup> cells in HCFs 1 week after GMTMM, GMTMM/miR-133, or GMTMM/miR-133/Snai1 transduction.

(D) QRT-PCR analyses for relative mRNA expression of cardiac genes in HCFs transduced with GMTMM, GMTMM/miR-133, or GMTMM/miR-133/Snai1 ( $n = 3$ ). See also **Figure 7H**.

(E) Immunocytochemistry for cTnT in HCFs transduced with GMTMM, GMTMM/miR-133, or GMTMM/miR-133/Snai1.

(F) Relative mRNA expression of cardiac genes (*Tnnt2*, *Nppa*, *Slc8a1*) and *Snai1* in HCFs transduced with GMTMM, GMTMM/si-Snai1, or GMTMM/miR-133 ( $n = 3$ ).

(G) FACS analyses for  $\alpha$ -actinin<sup>+</sup> cells. Snai1 suppression with GMTMM increased  $\alpha$ -actinin<sup>+</sup> cells.

(H, I) Immunocytochemistry for  $\alpha$ -actinin and DAPI. High-magnification view in inset shows sarcomeric organization. Snai1 suppression increased cardiac protein expression in GMTMM-transduced HCFs (I,  $n = 10$ ).

All data are presented as means  $\pm$  SEM. \*\*,  $P < 0.01$ ; \*,  $P < 0.05$  vs. relevant control. Scale bars, 100  $\mu$ m.
