# Supplementary material
Source: PubMed Central journal article supplement (PMC4198052)
Supplement: embj0033-1565-sd5.pdf [file embj0033-1565-sd5.pdf]

| Upregulated 46 genes (> 1.5) |                    |           |           |               | Ratio (GMTmiR/GMT) |       |        |
|------------------------------|--------------------|-----------|-----------|---------------|--------------------|-------|--------|
| Probe ID                     | Ensembl_ID         | RefSeq_ID | Enterz_ID | Symbol        | Day 3              | Day 7 | Day 18 |
| M200014493                   | ENSMUSG00000022598 | NM_028216 | 72373     | Psca          | 3.0                | 2.4   | 1.7    |
| M200009335                   | ENSMUSG00000028116 | NM_021503 | 59006     | Myoz2         | 1.8                | 1.9   | 1.7    |
| M400000984                   | ENSMUSG00000027022 | XM_141283 | 241431    | Cmya3         | 1.6                | 2.9   | 2.9    |
| M300004424                   | ENSMUSG00000025006 | -         | 20411     | Sorbs1        | 5.8                | 2.7   | 1.5    |
| M300013935                   | ENSMUSG00000053441 | NM_175506 | 240322    | Adams19       | 1.6                | 3.5   | 2.0    |
| M200015376                   | ENSMUSG00000027716 | NM_019510 | 22065     | Trpc3         | 2.0                | 1.9   | 1.8    |
| M400000394                   | ENSMUSG00000020566 | NM_133699 | 68775     | Atp6v1c2      | 1.8                | 2.0   | 1.9    |
| M300011226                   | ENSMUSG00000037926 | NM_177710 | 237860    | Ssh2          | 1.7                | 1.5   | 1.5    |
| M300010644                   | ENSMUSG00000036935 | -         | -         | Obscn         | 1.5                | 2.1   | 2.2    |
| M400000053                   | ENSMUSG00000002384 | NM_007559 | 12164     | Bmp8b         | 1.7                | 1.6   | 2.1    |
| M400007398                   | ENSMUSG00000061510 | -         | -         | -             | 1.5                | 1.5   | 1.6    |
| M400011736                   | ENSMUSG00000052374 | NM_033268 | -         | Actn2         | 2.1                | 2.1   | 2.0    |
| M300017980                   | ENSMUSG00000047117 | XM_197073 | 271144    | 9330128J19Rik | 2.2                | 1.8   | 1.5    |
| M300008131                   | -                  | XM_135000 | 76886     | -             | 1.7                | 2.2   | 1.6    |
| M300001580                   | ENSMUSG00000017412 | NM_146123 | 12298     | Cacnb4        | 2.0                | 1.7   | 1.6    |
| M300015129                   | ENSMUSG00000044086 | XM_149772 | 320502    | -             | 1.6                | 1.8   | 1.9    |
| M200002625                   | ENSMUSG00000031137 | NM_010200 | -         | Fgf13         | 1.6                | 2.4   | 1.7    |
| M400004095                   | ENSMUSG00000052374 | -         | 11472     | Actn2         | 2.0                | 2.3   | 2.1    |
| M400006302                   | ENSMUSG00000020908 | XM_354614 | 17883     | Myh3          | 2.3                | 1.5   | 1.6    |
| M200002473                   | ENSMUSG00000027452 | NM_080575 | 68738     | Acss1         | 3.2                | 2.5   | 1.9    |
| M200012924                   | ENSMUSG00000027985 | NM_010703 | 16842     | Lef1          | 2.4                | 3.0   | 1.7    |
| M300003179                   | ENSMUSG00000056867 | -         | -         | -             | 2.2                | 2.6   | 1.6    |
| M300017880                   | ENSMUSG00000047013 | NM_001001 | 330369    | Fbxo41        | 1.6                | 2.0   | 1.5    |
| M200007329                   | ENSMUSG00000039891 | NM_138628 | 378431    | Txlnb         | 4.2                | 2.7   | 1.8    |
| M300001423                   | ENSMUSG00000015568 | NM_008509 | 669888    | Lpl           | 3.7                | 1.7   | 1.6    |
| M300013987                   | ENSMUSG00000042895 | NM_175456 | 223513    | Abra          | 1.5                | 2.3   | 1.7    |
| M200000431                   | ENSMUSG00000028024 | NM_007934 | 13809     | Enpep         | 1.9                | 2.9   | 2.1    |
| M400007299                   | -                  | NM_019697 | 16508     | -             | 2.1                | 1.6   | 1.5    |
| M300000649                   | ENSMUSG00000005220 | -         | 53419     | Corin         | 1.8                | 2.9   | 1.8    |
| M300004252                   | ENSMUSG00000024647 | NM_172633 | -         | Cbln2         | 2.1                | 2.4   | 1.6    |
| M300008768                   | ENSMUSG00000033419 | NM_013669 | 20616     | Snap91        | 1.5                | 2.0   | 2.0    |
| M400004335                   | ENSMUSG00000053093 | NM_080728 | 140781    | Myh7          | 2.2                | 2.5   | 1.8    |
| M300011602                   | ENSMUSG00000038526 | -         | 23831     | Car14         | 2.0                | 3.1   | 2.1    |
| M400011363                   | ENSMUSG00000002980 | NM_020486 | 57278     | Bcam          | 1.8                | 1.5   | 1.6    |
| M300019880                   | ENSMUSG00000049115 | NM_177322 | 11607     | Agtr1a        | 1.8                | 2.5   | 3.4    |
| M300012836                   | ENSMUSG00000040752 | NM_010856 | 17888     | Myh6          | 4.7                | 2.8   | 1.7    |
| M300002037                   | ENSMUSG00000020173 | NM_172496 | -         | Cobl          | 5.0                | 3.7   | 1.9    |
| M200014547                   | ENSMUSG00000022025 | NM_010701 | 16840     | Lect1         | 2.0                | 3.3   | 1.6    |

|            |                    |           |        |               |     |     |     |
|------------|--------------------|-----------|--------|---------------|-----|-----|-----|
| M400017731 | -                  | -         | -      | -             | 3.0 | 2.3 | 2.4 |
| M200007693 | ENSMUSG00000032355 | -         | 69642  | 2310046A06Rik | 2.9 | 2.4 | 2.0 |
| M200015883 | ENSMUSG00000023336 | NM_023395 | 67866  | Wfdc1         | 2.6 | 1.7 | 2.1 |
| M300008566 | ENSMUSG00000033032 | NM_178928 | -      | Al173486      | 1.6 | 1.8 | 1.8 |
| M200007342 | ENSMUSG00000031382 | NM_026853 | -      | Asb11         | 1.9 | 3.7 | 2.4 |
| M200014014 | ENSMUSG00000030785 | NM_009943 | 12862  | Cox6a2        | 1.5 | 1.7 | 1.6 |
| M400002496 | ENSMUSG00000041361 | -         | 102371 | AA407270      | 1.5 | 1.7 | 1.6 |
| M400012375 | ENSMUSG00000043916 | NM_177147 | -      | -             | 1.5 | 1.7 | 1.6 |

| Downregulated 129 genes (< 0.67) |                    |           |           |               | Ratio (GMTmiR/GMT) |       |        |
|----------------------------------|--------------------|-----------|-----------|---------------|--------------------|-------|--------|
| Probe ID                         | Ensembl_ID         | RefSeq_ID | Enterz_ID | Symbol        | Day 3              | Day 7 | Day 18 |
| M200007795                       | ENSMUSG00000023191 | NM_013534 | 14789     | Leprel2       | 0.5                | 0.5   | 0.7    |
| M300000003                       | ENSMUSG00000048583 | -         | -         | Igf2          | 0.7                | 0.4   | 0.5    |
| M300011925                       | ENSMUSG00000039070 | NM_027926 | 71791     | Cpa4          | 0.6                | 0.5   | 0.6    |
| M300013932                       | -                  | -         | 27528     | -             | 0.5                | 0.5   | 0.6    |
| M300013202                       | ENSMUSG00000066361 | NM_008458 | 16625     | Serpina3c     | 0.6                | 0.7   | 0.2    |
| M200001705                       | ENSMUSG00000028214 | NM_010276 | -         | Gem           | 0.4                | 0.5   | 0.2    |
| M200001213                       | ENSMUSG00000033880 | NM_011150 | 19039     | Lgals3bp      | 0.5                | 0.6   | 0.6    |
| M200000882                       | ENSMUSG00000017969 | NM_008968 | 19223     | Ptgis         | 0.6                | 0.7   | 0.7    |
| M200006455                       | ENSMUSG00000029061 | NM_011985 | 26561     | Mmp23         | 0.3                | 0.4   | 0.5    |
| M200006538                       | ENSMUSG00000031740 | NM_008610 | 17390     | Mmp2          | 0.6                | 0.4   | 0.2    |
| M300005873                       | ENSMUSG00000027966 | NM_007729 | 12814     | Col11a1       | 0.3                | 0.6   | 0.3    |
| M400011405                       | ENSMUSG00000066705 | NM_022004 | 59095     | Fxyd6         | 0.3                | 0.5   | 0.7    |
| M200013767                       | ENSMUSG00000040690 | NM_028266 | -         | Col16a1       | 0.6                | 0.6   | 0.3    |
| M200013648                       | ENSMUSG00000054196 | XM_128002 | 68588     | Cthrc1        | 0.3                | 0.3   | 0.3    |
| M400001486                       | ENSMUSG00000032719 | XM_129714 | 226866    | Gm106         | 0.7                | 0.5   | 0.4    |
| M400006547                       | ENSMUSG00000058914 | NM_030888 | -         | C1qtnf3       | 0.3                | 0.5   | 0.4    |
| M200002112                       | ENSMUSG00000021250 | NM_010234 | 14281     | Fos           | 0.5                | 0.6   | 0.5    |
| M200003231                       | ENSMUSG00000029581 | NM_007984 | 14086     | Fscn1         | 0.6                | 0.5   | 0.5    |
| M400000352                       | ENSMUSG00000019989 | XM_483881 | 209558    | Enpp3         | 0.6                | 0.3   | 0.5    |
| M400008579                       | ENSMUSG00000060129 | NM_146331 | 258328    | Olf954        | 0.6                | 0.6   | 0.6    |
| M400007854                       | ENSMUSG00000062488 | NM_010501 | 15959     | lfit3         | 0.4                | 0.4   | 0.5    |
| M200005324                       | -                  | NM_011581 | -         | -             | 0.4                | 0.5   | 0.4    |
| M200008526                       | ENSMUSG00000028370 | XM_131437 | 18491     | Pappa         | 0.2                | 0.3   | 0.4    |
| M300000787                       | ENSMUSG00000006360 | -         | 12925     | Crip1         | 0.6                | 0.6   | 0.5    |
| M300000069                       | ENSMUSG00000000409 | NM_010693 | -         | Lck           | 0.5                | 0.5   | 0.4    |
| M300013059                       | ENSMUSG00000062980 | XM_145117 | 214642    | A430107O13Rik | 0.6                | 0.6   | 0.5    |
| M400001173                       | ENSMUSG00000075593 | XM_284152 | 330217    | Gal3st4       | 0.4                | 0.5   | 0.5    |
| M200003295                       | ENSMUSG00000040026 | NM_011315 | 20210     | Saa3          | 0.1                | 0.2   | 0.6    |
| M200014029                       | ENSMUSG00000048216 | NM_145066 | -         | Gpr85         | 0.4                | 0.6   | 0.7    |



|            |                    |            |        |               |     |     |     |
|------------|--------------------|------------|--------|---------------|-----|-----|-----|
| M200003823 | ENSMUSG00000028597 | NM_024198  | -      | Gpx7          | 0.6 | 0.5 | 0.6 |
| M200004720 | ENSMUSG00000028845 | NM_011902  | 24084  | Tekt2         | 0.6 | 0.6 | 0.6 |
| M200011786 | ENSMUSG00000021416 | NM_026947  | 69123  | 1810022C23Rik | 0.5 | 0.4 | 0.6 |
| M200013890 | ENSMUSG00000029832 | NM_010903  | 18025  | Nfe2l3        | 0.6 | 0.5 | 0.6 |
| M200006802 | ENSMUSG00000021069 | NM_133198  | 110095 | Pygl          | 0.7 | 0.6 | 0.6 |
| M200000630 | ENSMUSG00000031640 | NM_133969  | 102294 | Cyp4v3        | 0.6 | 0.7 | 0.6 |
| M200008248 | ENSMUSG00000020872 | NM_053093  | 93670  | Tac4          | 0.5 | 0.5 | 0.5 |
| M300001685 | ENSMUSG00000018500 | NM_007413  | 11541  | Adora2b       | 0.6 | 0.5 | 0.6 |
| M200000904 | ENSMUSG00000024190 | NM_013642  | 19252  | Dusp1         | 0.5 | 0.6 | 0.4 |
| M200007326 | ENSMUSG00000032925 | NM_145467  | 223272 | Itgbl1        | 0.5 | 0.5 | 0.6 |
| M300001793 | ENSMUSG00000019539 | NM_026555  | -      | Rcn3          | 0.4 | 0.5 | 0.5 |
| M300011001 | ENSMUSG00000037568 | NM_144879  | 226841 | Vash2         | 0.6 | 0.4 | 0.7 |
| M300009878 | ENSMUSG00000035357 | NM_018884  | -      | Pdzm3         | 0.4 | 0.4 | 0.5 |
| M400000940 | -                  | NM_008329  | -      | -             | 0.6 | 0.4 | 0.4 |
| M400007346 | ENSMUSG00000061232 | -          | 14972  | H2-K1         | 0.4 | 0.6 | 0.6 |
| M400015493 | -                  | -          | -      | -             | 0.6 | 0.6 | 0.6 |
| M400011549 | -                  | NM_026271  | 67606  | -             | 0.4 | 0.6 | 0.4 |
| M200015910 | ENSMUSG00000000693 | NM_013586  | 16950  | Loxl3         | 0.4 | 0.5 | 0.5 |
| M300000789 | ENSMUSG00000006369 | -          | -      | Fbln1         | 0.4 | 0.4 | 0.6 |
| M300008194 | ENSMUSG00000032334 | NM_010729  | 16949  | Loxl1         | 0.6 | 0.6 | 0.5 |
| M300013689 | ENSMUSG00000042429 | -          | -      | Adora1        | 0.5 | 0.5 | 0.6 |
| M400007361 | ENSMUSG00000061353 | NM_013655  | -      | Cxcl12        | 0.3 | 0.5 | 0.5 |
| M200003360 | ENSMUSG00000041481 | -          | 20715  | Serpina3g     | 0.3 | 0.5 | 0.4 |
| M200004448 | ENSMUSG00000001506 | NM_007742  | 12842  | Col1a1        | 0.3 | 0.5 | 0.5 |
| M300022056 | -                  | NM_178879  | 97440  | -             | 0.5 | 0.6 | 0.6 |
| M400003897 | ENSMUSG00000051811 | -          | -      | Cox6b2        | 0.6 | 0.7 | 0.6 |
| M400011526 | ENSMUSG00000045889 | NM_025980  | 67122  | -             | 0.3 | 0.3 | 0.4 |
| M200000303 | ENSMUSG00000069874 | -          | 16145  | ligp2         | 0.6 | 0.6 | 0.6 |
| M200007654 | -                  | NM_028331  | 72709  | -             | 0.6 | 0.6 | 0.7 |
| M300012830 | ENSMUSG00000062609 | NM_019664  | -      | Kcnj15        | 0.6 | 0.5 | 0.6 |
| M400011342 | ENSMUSG00000061232 | NM_019909  | -      | H2-K1         | 0.5 | 0.6 | 0.6 |
| M200007006 | ENSMUSG00000050370 | NM_009890  | 12642  | Ch25h         | 0.4 | 0.5 | 0.6 |
| M200001767 | ENSMUSG00000029661 | NM_007743  | 12843  | Col1a2        | 0.5 | 0.3 | 0.5 |
| M200000992 | ENSMUSG00000031375 | NM_007542  | -      | Bgn           | 0.6 | 0.3 | 0.5 |
| M200001048 | ENSMUSG00000020053 | NM_010512; | 16000  | Igf1          | 0.6 | 0.5 | 0.6 |
| M200009328 | ENSMUSG00000015134 | NM_053080  | 56847  | Aldh1a3       | 0.5 | 0.6 | 0.6 |
| M200006998 | ENSMUSG00000028037 | NM_133871  | 99899  | Ifi44         | 0.5 | 0.6 | 0.6 |
| M200013848 | ENSMUSG00000000627 | NM_011350  | 20355  | Sema4f        | 0.5 | 0.4 | 0.4 |
| M300005140 | ENSMUSG00000026494 | NM_177757  | 269152 | Kif26b        | 0.5 | 0.6 | 0.6 |
| M400002349 | ENSMUSG00000040253 | NM_145545  | 229900 | Gbp6          | 0.5 | 0.5 | 0.7 |

|            |                    |           |           |               |     |     |     |
|------------|--------------------|-----------|-----------|---------------|-----|-----|-----|
| M400008542 | ENSMUSG00000064080 | NM_007992 | 14115     | Fbln2         | 0.6 | 0.5 | 0.5 |
| M200002477 | ENSMUSG00000043943 | NM_028279 | 72560     | Naalad2       | 0.2 | 0.5 | 0.6 |
| M200002417 | ENSMUSG00000073421 | NM_207105 | 14961     | Rmcs2         | 0.6 | 0.3 | 0.6 |
| M200002335 | ENSMUSG00000005357 | NM_009200 | 20513     | Slc1a6        | 0.6 | 0.6 | 0.6 |
| M300007456 | ENSMUSG00000030849 | NM_201601 | -         | Fgfr2         | 0.6 | 0.5 | 0.7 |
| M400011073 | -                  | NM_010818 | -         | -             | 0.6 | 0.6 | 0.7 |
| M200000375 | ENSMUSG00000025746 | NM_031168 | 16193     | Il6           | 0.3 | 0.4 | 0.6 |
| M400014575 | -                  | -         | 432572    | -             | 0.4 | 0.5 | 0.6 |
| M200006636 | ENSMUSG00000024660 | NM_016692 | -         | Incenp        | 0.6 | 0.5 | 0.6 |
| M200006465 | ENSMUSG00000042436 | NM_029568 | 76293     | Mfap4         | 0.5 | 0.3 | 0.3 |
| M200006244 | ENSMUSG00000031595 | NM_026840 | 68797     | Pdgfrl        | 0.4 | 0.5 | 0.6 |
| M200015105 | ENSMUSG00000029659 | NM_027519 | -         | 6330406115Rik | 0.5 | 0.5 | 0.6 |
| M300005317 | ENSMUSG00000026837 | NM_015734 | 12831     | Col5a1        | 0.6 | 0.5 | 0.5 |
| M300006055 | ENSMUSG00000039298 | NM_145990 | -         | Cdk5rap2      | 0.6 | 0.4 | 0.7 |
| M200005191 | ENSMUSG00000021388 | NM_025711 | 66695     | Aspn          | 0.3 | 0.3 | 0.3 |
| M200002418 | ENSMUSG00000034459 | NM_008331 | 15957     | Ifit1         | 0.7 | 0.4 | 0.4 |
| M200002538 | ENSMUSG00000060572 | NM_008546 | 17150     | Mfap2         | 0.5 | 0.2 | 0.5 |
| M300011913 | ENSMUSG00000039058 | -         | 229949    | Ak5           | 0.6 | 0.3 | 0.6 |
| M200001343 | ENSMUSG00000051439 | NM_009841 | 12475     | Cd14          | 0.5 | 0.6 | 0.6 |
| M400011289 | ENSMUSG00000069874 | NM_018738 | 16145     | Ilgp2         | 0.6 | 0.5 | 0.6 |
| M400004256 | ENSMUSG00000052837 | NM_008416 | 16477     | Junb          | 0.5 | 0.6 | 0.5 |
| M200000995 | ENSMUSG00000032532 | NM_031161 | 12424     | Cck           | 0.4 | 0.4 | 0.5 |
| M200003721 | ENSMUSG00000039236 | NM_020583 | -         | Isg20         | 0.4 | 0.4 | 0.7 |
| M200011774 | ENSMUSG00000060935 | -         | 74238     | A1597468      | 0.5 | 0.6 | 0.5 |
| M300010216 | ENSMUSG00000036040 | XM_130065 | 77794     | Adamtsl2      | 0.4 | 0.6 | 0.6 |
| M300003525 | -                  | NM_008047 | 14314     | -             | 0.5 | 0.5 | 0.6 |
| M300008736 | ENSMUSG00000071715 | NM_008677 | 17972     | Ncf4          | 0.4 | 0.4 | 0.6 |
| M400003948 | ENSMUSG00000051956 | NM_198251 | 386611    | Rnf133        | 0.5 | 0.6 | 0.7 |
| M400011244 | -                  | NM_015783 | 100038882 | -             | 0.7 | 0.6 | 0.6 |
| M200009417 | ENSMUSG00000031762 | NM_008630 | 17750     | Mt2           | 0.6 | 0.6 | 0.5 |
| M200007311 | ENSMUSG00000028475 | NM_027789 | 71406     | 5430416O09Rik | 0.6 | 0.5 | 0.4 |
| M300010436 | ENSMUSG00000036560 | NM_144556 | -         | Lgi4          | 0.7 | 0.4 | 0.1 |
| M400002912 | ENSMUSG00000044548 | NM_021532 | 59036     | Dact1         | 0.4 | 0.5 | 0.6 |
| M400008091 | -                  | NM_080640 | -         | -             | 0.5 | 0.6 | 0.6 |
| M200005312 | ENSMUSG00000030701 | NM_013746 | -         | Plekhb1       | 0.6 | 0.4 | 0.3 |
| M200012174 | ENSMUSG00000057123 | NM_008121 | 14613     | Gja5          | 0.7 | 0.7 | 0.3 |
| M400004210 | ENSMUSG00000052684 | NM_010591 | 16476     | Jun           | 0.5 | 0.6 | 0.6 |
| M200000527 | ENSMUSG00000037868 | NM_010118 | 13654     | Egr2          | 0.5 | 0.6 | 0.5 |
| M200000943 | ENSMUSG00000001119 | NM_009933 | 12833     | Col6a1        | 0.5 | 0.4 | 0.5 |
| M200004208 | ENSMUSG00000029716 | NM_015799 | -         | Trfr2         | 0.6 | 0.3 | 0.4 |

|            |                    |            |        |           |     |     |     |
|------------|--------------------|------------|--------|-----------|-----|-----|-----|
| M200004133 | ENSMUSG00000025150 | NM_007621  | 12409  | Cbr2      | 0.5 | 0.5 | 0.7 |
| M200006363 | ENSMUSG00000041809 | XM_129694  | 71877  | Efhc1     | 0.5 | 0.5 | 0.5 |
| M400000558 | ENSMUSG00000022321 | XM_283264  | 320873 | Cdh10     | 0.7 | 0.7 | 0.6 |
| M400012036 | ENSMUSG00000067525 | NM_146679  | 258674 | Olfir1427 | 0.4 | 0.6 | 0.5 |
| M200012044 | ENSMUSG00000038418 | NM_007913  | 13653  | Egr1      | 0.6 | 0.5 | 0.5 |
| M200003247 | ENSMUSG00000027656 | NM_016873  | 22403  | Wisps2    | 0.3 | 0.4 | 0.4 |
| M200013217 | ENSMUSG00000024695 | NM_053007; | -      | Cntf      | 0.7 | 0.5 | 0.5 |
| M400001027 | ENSMUSG00000027750 | NM_015784  | 50706  | Postn     | 0.6 | 0.4 | 0.1 |
| M300000112 | ENSMUSG00000000753 | NM_011340  | 20317  | Serpinf1  | 0.4 | 0.4 | 0.4 |
| M300012538 | -                  | NM_172778  | 109731 | -         | 0.7 | 0.3 | 0.3 |
| M400013003 | ENSMUSG00000034810 | -          | -      | Scn7a     | 0.5 | 0.5 | 0.4 |
| M200014441 | ENSMUSG00000029163 | NM_133918  | 100952 | Emilin1   | 0.6 | 0.4 | 0.5 |
| M200013683 | ENSMUSG00000038530 | NM_009062  | 19736  | Rgs4      | 0.7 | 0.6 | 0.5 |
| M300000002 | ENSMUSG00000000031 | NR_001592  | -      | H19       | 0.5 | 0.3 | 0.4 |
| M300011961 | ENSMUSG00000039109 | NM_028784  | 74145  | F13a1     | 0.6 | 0.5 | 0.5 |
| M300002557 | ENSMUSG00000021091 | NM_009252  | 20716  | Serpina3n | 0.3 | 0.3 | 0.1 |
| M200004035 | -                  | NM_008176  | 14825  | -         | 0.1 | 0.5 | 0.4 |
| M200006739 | ENSMUSG00000046879 | NM_008326  | -      | Irgm      | 0.5 | 0.6 | 0.6 |
| M200006344 | ENSMUSG00000023571 | NM_026125  | 67389  | C1qdc2    | 0.6 | 0.5 | 0.7 |
| M300005379 | ENSMUSG00000026923 | NM_008714  | 18128  | Notch1    | 0.6 | 0.6 | 0.4 |

**Table S1. List of Differentially Expressed Genes between GMT-iCMs and GMT/miR-133-iCMs**

Among 23474 probes, 46 genes were upregulated and 129 genes were downregulated in GMT/miR-133-iCMs compared with GMT-iCMs at all stages.
