# Supplementary material
Source: PubMed Central journal article supplement (PMC4198052)
Supplement: embj0033-1565-sd6.pdf [file embj0033-1565-sd6.pdf]

A. Mouse embryonic fibroblasts

| 1W         | FACS         |              |         |               |          |              |         |               |
|------------|--------------|--------------|---------|---------------|----------|--------------|---------|---------------|
|            | αMHC-GFP (%) |              |         |               | cTnT (%) |              |         |               |
| Experiment | GMT          | GMT/si-Snai1 | GMT/miR | GMT/miR/Snai1 | GMT      | GMT/si-Snai1 | GMT/miR | GMT/miR/Snai1 |
| 1          | 20.5         |              | 32.9    |               | 1.9      |              | 11.5    |               |
| 2          | 20.3         |              | 33.5    |               | 2.8      |              | 11.1    |               |
| 3          | 18.8         |              | 32.9    |               | 1.8      |              | 11.9    |               |
| 4          | 13.1         |              | 20.2    |               | 2.0      |              | 7.3     |               |
| 5          | 14.9         |              | 19.7    |               | 2.2      |              | 7.7     |               |
| 6          | 15.0         |              | 17.0    |               | 1.8      |              | 5.1     |               |
| 7          | 11.7         |              | 25.6    |               | 1.4      |              | 11.5    |               |
| 8          | 10.1         |              | 24.5    |               | 1.1      |              | 11.2    |               |
| 9          | 13.6         |              | 25.6    |               | 2.2      |              | 12.9    |               |
| 10         | 10.4         | 19.4         | 20.4    |               | 1.7      | 5.3          | 9.5     |               |
| 11         | 8.2          | 26.6         | 18.1    |               | 1.7      | 8.7          | 6.9     |               |
| 12         | 10.2         | 17.3         | 19.9    |               | 1.9      | 4.9          | 8.3     |               |
| 13         | 13.3         |              | 27.6    |               | 2.5      |              | 11.8    |               |
| 14         | 13.3         |              | 27.6    |               | 2.6      |              | 11.2    |               |
| 15         | 13.4         |              | 28.5    |               | 2.3      |              | 11.8    |               |
| 16         | 19.8         |              | 27.6    |               | 3.1      |              | 7.4     |               |
| 17         | 20.1         |              | 28.6    |               | 3.2      |              | 8.4     |               |
| 18         | 18.8         |              | 27.9    |               | 2.7      |              | 7.0     |               |
| 19         | 21.6         |              | 32.7    | 18.1          | 1.3      |              | 10.3    | 6.4           |
| 20         | 19.6         |              | 31.8    | 16.0          | 1.1      |              | 9.6     | 5.2           |
| 21         | 20.1         |              | 32.2    | 17.8          | 1.2      |              | 11.5    | 7.8           |

| 4W         | Immunocytochemistry |              |         |               |               |              |         |               |
|------------|---------------------|--------------|---------|---------------|---------------|--------------|---------|---------------|
|            | αMHC-GFP (%)        |              |         |               | α-Actinin (%) |              |         |               |
| Experiment | GMT                 | GMT/si-Snai1 | GMT/miR | GMT/miR/Snai1 | GMT           | GMT/si-Snai1 | GMT/miR | GMT/miR/Snai1 |
| 1          | 4.5                 |              | 12.0    | 5.3           | 2.7           |              | 6.8     | 1.2           |
| 2          | 3.4                 |              | 14.8    | 3.6           | 1.4           |              | 8.8     | 0.6           |
| 3          | 3.6                 |              | 9.9     | 4.3           | 2.1           |              | 7.5     | 0.4           |
| 4          | 5.4                 |              | 11.5    | 5.6           | 1.9           |              | 6.0     | 1.0           |
| 5          | 3.0                 |              | 9.0     | 3.3           | 1.7           |              | 5.8     | 1.0           |
| 6          | 4.3                 | 6.0          |         |               | 1.7           | 3.4          |         |               |
| 7          | 4.1                 | 6.9          |         |               | 1.4           | 2.8          |         |               |
| 8          | 3.7                 | 7.3          |         |               | 1.9           | 3.4          |         |               |
| 9          | 6.0                 | 8.9          |         |               | 2.2           | 4.0          |         |               |
| 10         | 3.7                 | 9.2          |         |               | 2.4           | 4.3          |         |               |

| 4W         | Immunocytochemistry |              |         |               |        |              |         |               |
|------------|---------------------|--------------|---------|---------------|--------|--------------|---------|---------------|
|            | cTnT(%)             |              |         |               | ANP(%) |              |         |               |
| Experiment | GMT                 | GMT/si-Snai1 | GMT/miR | GMT/miR/Snai1 | GMT    | GMT/si-Snai1 | GMT/miR | GMT/miR/Snai1 |
| 1          | 1.7                 |              | 4.0     | 0.7           | 0.7    |              | 2.9     | 0.5           |
| 2          | 1.2                 |              | 6.4     | 1.4           | 0.8    |              | 2.9     | 0.6           |
| 3          | 1.2                 |              | 5.0     | 0.7           | 0.7    |              | 2.8     | 1.3           |
| 4          | 2.2                 |              | 6.7     | 0.8           | 1.9    |              | 2.8     | 0.6           |
| 5          | 1.7                 |              | 3.9     | 0.9           | 1.2    |              | 6.0     | 1.1           |

|    |     |     |  |  |     |     |  |  |
|----|-----|-----|--|--|-----|-----|--|--|
| 6  | 1.1 | 2.8 |  |  | 1.1 | 3.7 |  |  |
| 7  | 2.0 | 2.3 |  |  | 0.7 | 3.4 |  |  |
| 8  | 1.8 | 3.0 |  |  | 1.8 | 2.7 |  |  |
| 9  | 1.6 | 3.5 |  |  | 0.9 | 2.9 |  |  |
| 10 | 1.5 | 3.4 |  |  | 1.1 | 5.3 |  |  |

| 4W         | Functional study                                         |              |         |               |
|------------|----------------------------------------------------------|--------------|---------|---------------|
|            | Number of Ca <sup>2+</sup> transient+ cells (/10 fields) |              |         |               |
| Experiment | GMT                                                      | GMT/si-Snai1 | GMT/miR | GMT/miR/Snai1 |
| 1          | 13                                                       |              | 76      |               |
| 2          | 9                                                        |              | 52      |               |
| 3          | 8                                                        |              | 51      |               |
| 4          | 8                                                        | 12           | 62      | 6             |
| 5          | 9                                                        | 25           | 54      | 5             |
| 6          | 21                                                       | 20           | 46      | 4             |
| 7          | 9                                                        | 27           | 110     | 2             |
| 8          | 12                                                       | 17           | 47      | 4             |
| 9          | 11                                                       | 16           | 84      | 6             |
| 10         | 7                                                        | 24           | 43      | 3             |
| 11         | 7                                                        | 23           | 56      | 5             |

| 4W         | Functional study                |              |         |               |
|------------|---------------------------------|--------------|---------|---------------|
|            | Number of beating cells (/well) |              |         |               |
| Experiment | GMT                             | GMT/si-Snai1 | GMT/miR | GMT/miR/Snai1 |
| 1          | 2                               | 6            | 23      |               |
| 2          | 3                               | 7            | 15      |               |
| 3          | 2                               | 9            | 18      |               |
| 4          | 3                               |              | 27      | 2             |
| 5          | 3                               |              | 23      | 1             |
| 6          | 2                               |              | 18      | 2             |

## B. Adult mouse cardiac fibroblasts

| 1W         | FACS         |         |               |          |         |               |
|------------|--------------|---------|---------------|----------|---------|---------------|
|            | αMHC-GFP (%) |         |               | cTnT (%) |         |               |
| Experiment | GMT          | GMT/miR | GMT/miR/Snai1 | GMT      | GMT/miR | GMT/miR/Snai1 |
| 1          | 6.4          | 10.6    | 3.3           | 0.5      | 1.3     | 0.5           |
| 2          | 9.6          | 9.5     | 3.7           | 1.0      | 1.4     | 0.8           |
| 3          | 9.9          | 10.6    | 7.5           | 1.1      | 1.5     | 1.3           |
| 4          | 5.9          | 13.0    | 5.4           | 0.4      | 4.3     | 1.3           |
| 5          | 6.3          | 12.8    | 7.2           | 0.4      | 3.8     | 1.8           |
| 6          | 6.1          | 12.6    | 7.2           | 0.4      | 3.4     | 1.8           |
| 7          | 8.0          | 12.8    |               | 0.3      | 1.2     |               |
| 8          | 6.8          | 10.0    |               | 0.2      | 1.0     |               |
| 9          | 7.6          | 13.9    |               | 0.2      | 1.3     |               |

| 4W         | Immunocytochemistry |              |         |               |               |              |         |               |
|------------|---------------------|--------------|---------|---------------|---------------|--------------|---------|---------------|
|            | αMHC-GFP (%)        |              |         |               | α-Actinin (%) |              |         |               |
| Experiment | GMT                 | GMT/si-Snai1 | GMT/miR | GMT/miR/Snai1 | GMT           | GMT/si-Snai1 | GMT/miR | GMT/miR/Snai1 |
| 1          | 3.6                 |              | 8.9     | 6.0           | 1.8           |              | 4.4     | 1.2           |
| 2          | 2.8                 |              | 7.7     | 3.8           | 0.0           |              | 2.6     | 0.0           |

|    |     |     |      |     |     |     |     |     |
|----|-----|-----|------|-----|-----|-----|-----|-----|
| 3  | 2.5 |     | 7.1  | 3.4 | 1.3 |     | 4.8 | 0.0 |
| 4  | 4.5 |     | 10.6 | 3.3 | 0.0 |     | 2.1 | 0.0 |
| 5  | 3.9 |     | 8.3  | 1.3 | 0.0 |     | 1.7 | 0.3 |
| 6  | 2.1 | 2.7 |      |     | 0.5 | 1.2 |     |     |
| 7  | 2.2 | 5.4 |      |     | 0.7 | 2.2 |     |     |
| 8  | 2.8 | 4.5 |      |     | 0.9 | 3.0 |     |     |
| 9  | 1.9 | 2.7 |      |     | 0.8 | 0.9 |     |     |
| 10 | 3.0 | 5.3 |      |     | 0.5 | 2.6 |     |     |

|            |                                                          |         |               |
|------------|----------------------------------------------------------|---------|---------------|
| 4W         | Functional study                                         |         |               |
|            | Number of Ca <sup>2+</sup> transient+ cells (/10 fields) |         |               |
| Experiment | GMT                                                      | GMT/miR | GMT/miR/Snai1 |
| 1          | 4                                                        | 8       | 0             |
| 2          | 2                                                        | 5       | 0             |
| 3          | 2                                                        | 6       | 0             |

### C. Human cardiac fibroblasts

|            |               |                |           |                 |
|------------|---------------|----------------|-----------|-----------------|
| 1W         | FACS          |                |           |                 |
|            | α-Actinin (%) |                |           |                 |
| Experiment | GMTMM         | GMTMM/si-Snai1 | GMTMM/miR | GMTMM/miR/Snai1 |
| 1          | 8.4           | 20.6           | 26.9      |                 |
| 2          | 8.6           |                | 23.5      | 13.6            |

|            |          |           |                 |
|------------|----------|-----------|-----------------|
| 1W         | FACS     |           |                 |
|            | cTnT (%) |           |                 |
| Experiment | GMTMM    | GMTMM/miR | GMTMM/miR/Snai1 |
| 1          | 0.7      | 24.3      | 12.4            |
| 2          | 2.4      | 27.8      | 15.2            |
| 3          | 1.7      | 17.9      | 10.0            |
| 4          | 1.8      | 18.0      | 8.8             |

|            |                     |                |           |                 |
|------------|---------------------|----------------|-----------|-----------------|
| 4W         | Immunocytochemistry |                |           |                 |
|            | α-Actinin (%)       |                |           |                 |
| Experiment | GMTMM               | GMTMM/si-Snai1 | GMTMM/miR | GMTMM/miR/Snai1 |
| 1          | 1.0                 |                | 5.8       | 1.1             |
| 2          | 3.3                 |                | 9.2       | 1.6             |
| 3          | 2.8                 |                | 11.1      | 2.9             |
| 4          | 0.7                 |                | 7.5       | 0.4             |
| 5          | 3.5                 |                | 4.1       | 2.0             |
| 6          | 1.3                 |                | 5.2       | 3.4             |
| 7          | 3.6                 |                | 7.0       | 1.4             |
| 8          | 2.5                 |                | 7.4       | 2.4             |
| 9          | 1.7                 |                | 11.8      | 1.0             |
| 10         | 3.3                 |                | 12.7      | 5.7             |
| 11         | 2.5                 | 3.6            |           |                 |
| 12         | 2.7                 | 7.7            |           |                 |
| 13         | 1.6                 | 2.5            |           |                 |
| 14         | 1.8                 | 4.8            |           |                 |
| 15         | 2.2                 | 6.4            |           |                 |
| 16         | 4.8                 | 3.7            |           |                 |

|    |     |     |  |  |
|----|-----|-----|--|--|
| 17 | 1.4 | 6.3 |  |  |
| 18 | 1.9 | 7.9 |  |  |
| 19 | 1.9 | 6.7 |  |  |
| 20 | 4.9 | 2.8 |  |  |

**Table U2. List of FACS Analyses, Immunocytochemistry, and Functional Assays Obtained in This Study**

FACS data for  $\alpha$ MHC-GFP<sup>+</sup>, cTnT<sup>+</sup>, and  $\alpha$ -actinin<sup>+</sup> cells; immunocytochemistry data for  $\alpha$ MHC-GFP<sup>+</sup>,  $\alpha$ -actinin<sup>+</sup>, cTnT<sup>+</sup>, and ANP<sup>+</sup> cells; and number of Ca<sup>2+</sup> transient<sup>+</sup> cells and spontaneously beating cells, in MEFs, adult CFs, and HCFs after 1 or 4 weeks of GMT, GMT/si-Snai1, GMT/miR-133, GMT/miR-133/Snai1, GMTMM, GMTMM/si-Snai1, GMTMM/miR-133, GMTMM/miR-133/Snai1 transduction are shown.
