# Supplementary material
Source: PubMed Central journal article supplement (PMC4198052)
Supplement: embj0033-1565-sd12.pdf [file embj0033-1565-sd12.pdf]

**Movie S1.**

Spontaneous  $\text{Ca}^{2+}$  oscillations were observed in GMT/miR-133-iCMs derived from MEFs after 4 weeks of induction, corresponding to **Figure 2D**.

**Movie S2.**

Spontaneously beating GMT/miR-133-iCMs derived from MEFs after 4 weeks of transduction, corresponding to **Figure 2F**.

**Movie S3.**

Spontaneously beating GMT/miR-133-iCMs derived from MEFs after 2 weeks of transduction, corresponding to Supplementary **Figure S2E**.

**Movie S4.**

Spontaneously beating GMT/si-Snai1-iCMs derived from MEFs after 4 weeks of transduction, corresponding to Supplementary **Figure S3D**.

**Movie S5.**

Spontaneous  $\text{Ca}^{2+}$  oscillations were observed in GMT/miR-133-iCMs derived from adult CFs after 4 weeks of induction, corresponding to **Figure 6G**.
